# Supplementary material for: Reaction lumping in metabolic networks for application with thermodynamic metabolic flux analysis
Source: PubMed Central journal article supplement (PMC8058346; doi:10.1038/s41598-021-87643-8), 2021-04-20
Supplement: 41598_2021_87643_MOESM1_ESM.pdf [file 41598_2021_87643_MOESM1_ESM.pdf]

# Reaction lumping in metabolic networks for application with thermodynamic metabolic flux analysis- Supplementary

Lea Seep, Zahra Razaghi-Moghadam and Zoran Nikoloski

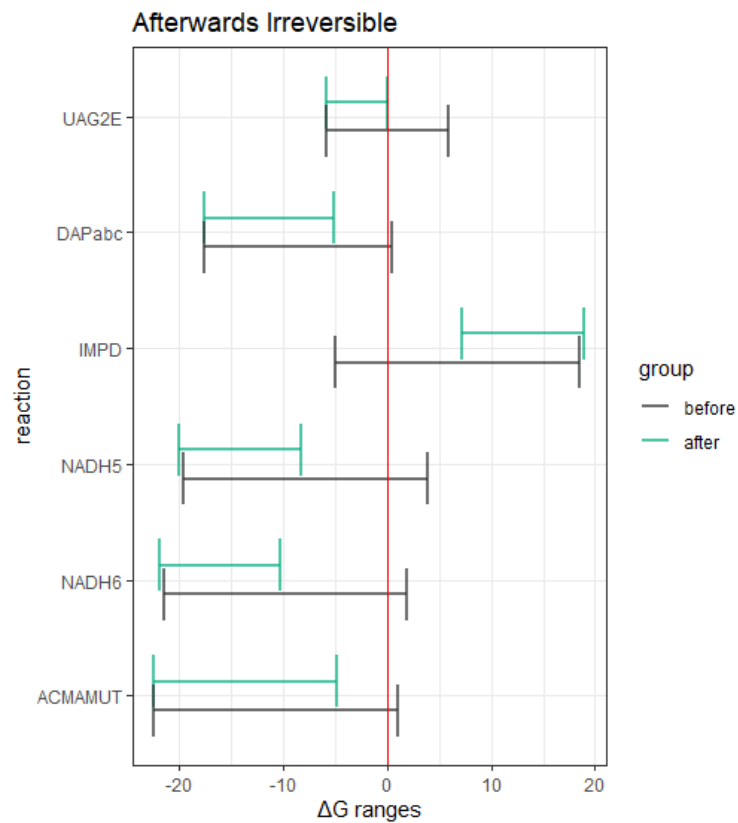

**Figure S1 – Reactions deemed irreversible after lumping in *E. coli*.** The  $\Delta G$ -ranges of all reactions that can be only determined irreversible after lumping. Grey coloured bars show the range before, green coloured bars after lumping is applied.

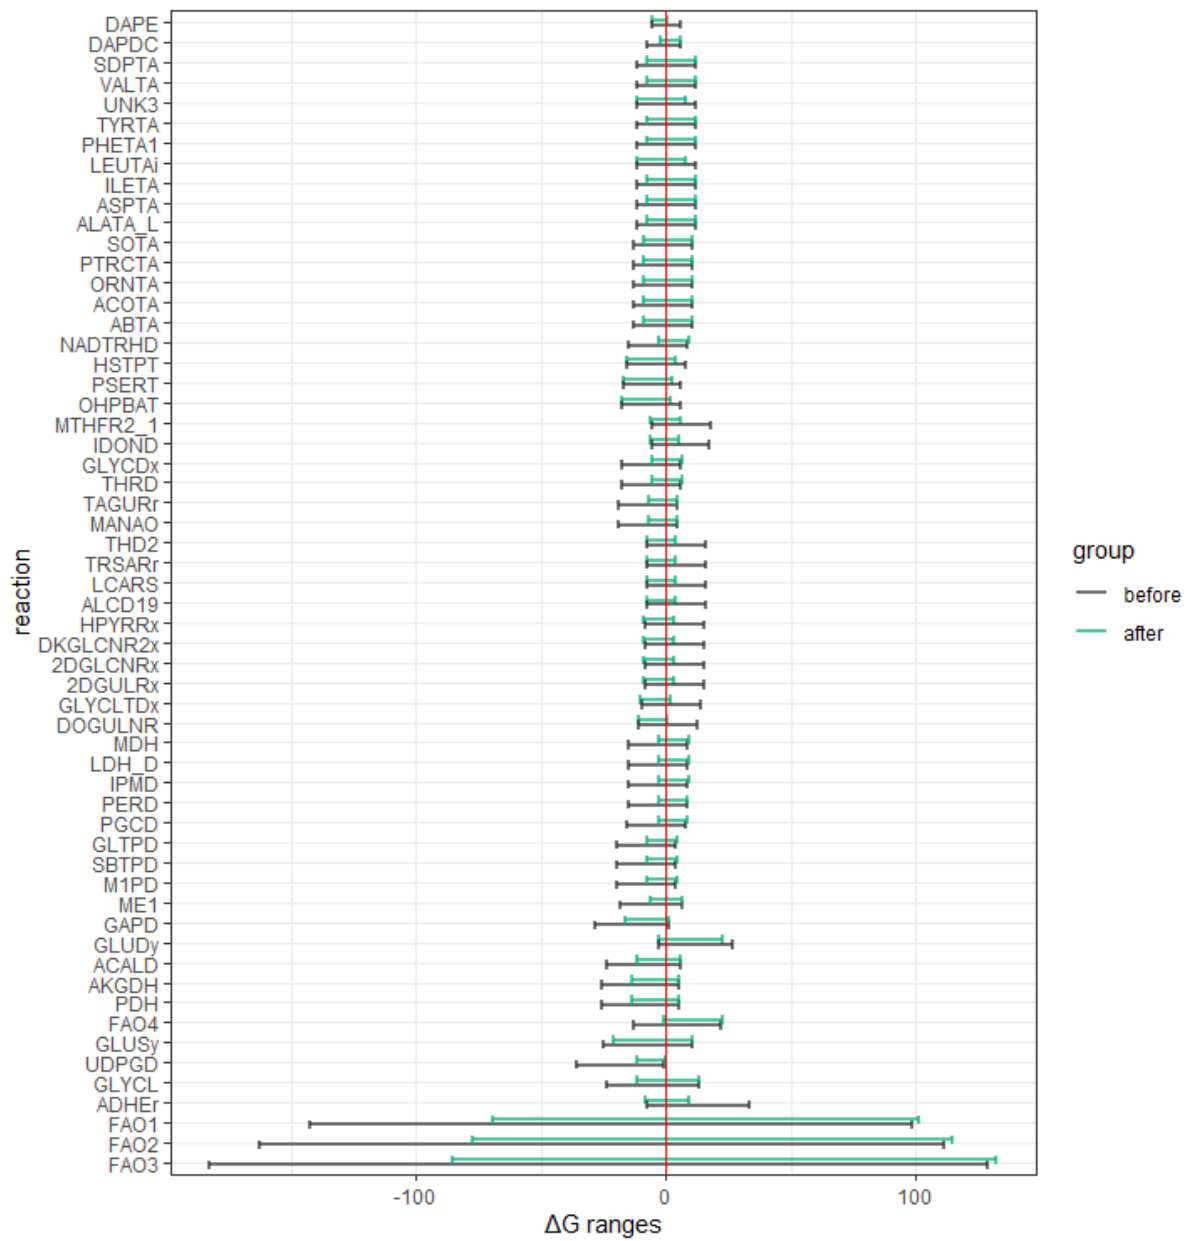

**Figure S2 – Decreased  $\Delta G$ -ranges after lumping in *E. coli*.** All reactions that show a decrease regarding the variable space of  $\Delta G$  after lumping is applied. The grey bars indicate the range before, the green bars after lumping was applied.

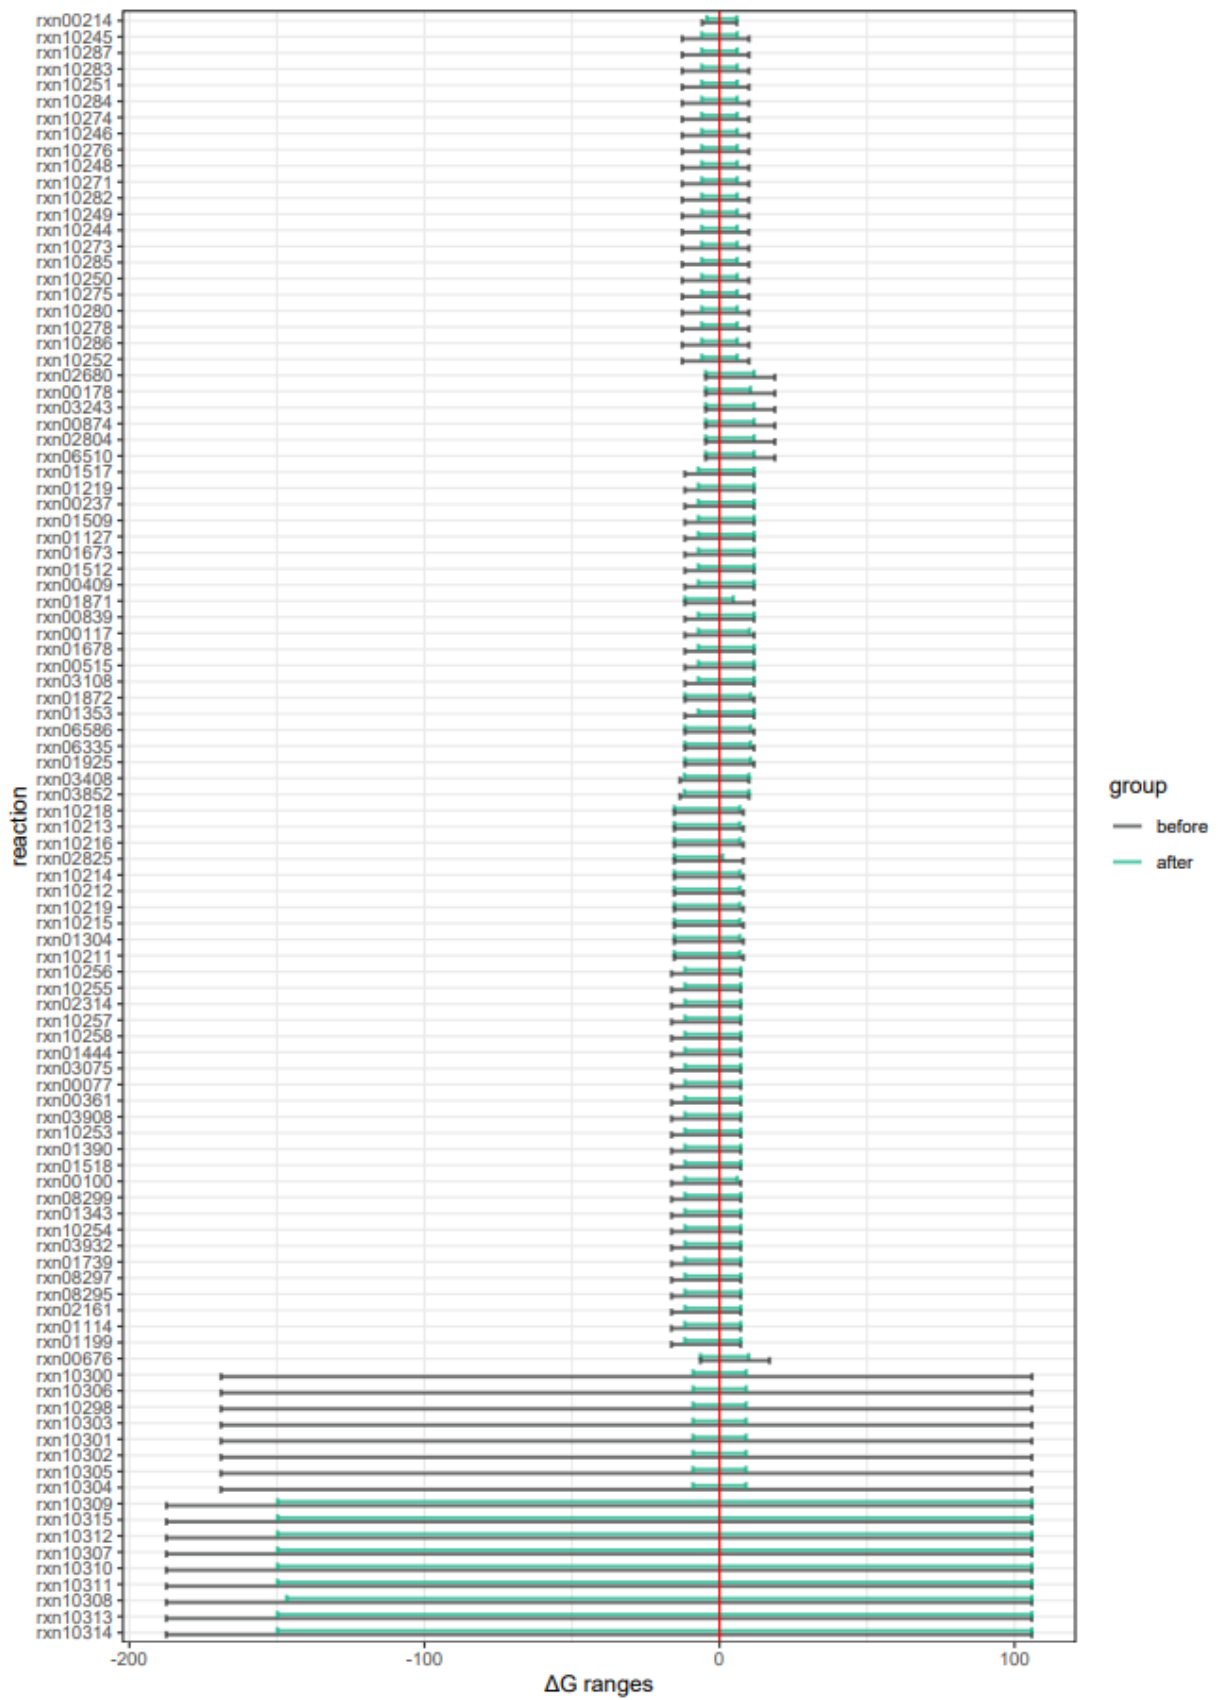

**Figure S3. Different  $\Delta G$ -ranges after lumping in *B. subtilis*.** All reactions that exhibit either a change or a shift of respective  $\Delta G$ -range after lumping is applied. Grey coloured bars show the range before, green coloured bars after lumping is applied.
